# Supplementary material
Source: PubMed Central journal article supplement (PMC3993946)
Supplement: ic402825t_si_001.pdf [file ic402825t_si_001.pdf]

## Supporting Information

### **Cu-free 1,3-dipolar cycloaddition click reactions to form isoxazole linkers in chelating ligands for *fac*-[M<sup>I</sup>(CO)<sub>3</sub>]<sup>+</sup> centers (M = Re, <sup>99m</sup>Tc)**

Shalina C. Bottorff<sup>1</sup>, Benjamin B. Kasten<sup>1</sup>, Jelena Stojakovic<sup>2</sup>, Adam L. Moore<sup>1</sup>, Leonard R. MacGillivray<sup>2</sup> and Paul D. Benny<sup>1\*</sup>

<sup>1</sup>Department of Chemistry, Washington State University, PO Box 644630, Pullman, WA 99164, USA

<sup>2</sup>Department of Chemistry, University of Iowa, Iowa City, Iowa 52242-1294, USA

## Experimental

All reagents and organic solvents were of reagent grade or better and used as purchased from Aldrich, Acros, or Fluka without further purification. Rhenium starting material *fac*-[Re<sup>I</sup>(OH<sub>2</sub>)<sub>3</sub>(CO)<sub>3</sub>](OSO<sub>2</sub>CF<sub>3</sub>), was prepared by literature methods from Re<sub>2</sub>(CO)<sub>10</sub> purchased from Strem.<sup>1</sup> The preparations of *N,N*-bis(pyridin-2-ylmethyl)prop-2-yn-1-amine, (**1**), methyl 2-(prop-2-ynyl(pyridine-2-ylmethyl)amino)acetate (**2**), 2-(prop-2-yn-1-yl(pyridin-2-ylmethyl)amino)acetic acid (**3**), *fac*-[Re<sup>I</sup>(CO)<sub>3</sub>(**3**)] (**11**),<sup>2</sup> *N*-hydroxybenzimidoyl chloride (**4**),<sup>3</sup> and [*fac*-Re<sup>I</sup>(CO)<sub>3</sub>(**1**)](OSO<sub>2</sub>CF<sub>3</sub>) (**10**),<sup>4</sup> were performed as previously reported. UV-Vis spectra were obtained using a Varian Cary 50 spectrophotometer (1 cm path-length). <sup>1</sup>H and <sup>13</sup>C NMR spectra were recorded on a Varian 300 MHz instrument at 25 °C. Elemental analyses were performed by Intertek Pharmaceutical Services, NJ or Atlantic Microlab, Inc. Norcross, GA. Analytical separation and identification of compounds were conducted on a Perkin Elmer Series 200 High Pressure Liquid Chromatograph (HPLC) equipped with a UV/VIS Series 200 detector and a Radiomatic 610TR detector. Utilizing a Varian Pursuit XRS 5μm particle and 250 x 4.6 mm C18 column, the compounds were separated with a reverse phase gradient system beginning with 0.1% trifluoroacetic acid (TFA) aqueous eluent gradually shifting to methanol according to the following method: 0-3.0 min (100% TFA), 3.0-9.0 min (75% TFA, 25% MeOH), 9.0-20.0 min (25% to 100% MeOH linear gradient), 20.0-30.0 min (100% MeOH) at a flow rate of 1.0 mL/min. Preparatory separations of compounds were conducted on a Hitachi D-7000 High Pressure Liquid Chromatograph (HPLC) equipped with a UV/VIS Series L-7400 detector and a L-7150 pump.

Utilizing a Phenomenex Gemini 5 $\mu$ m particle and 250 x 21.20 mm C18 column, the compounds were separated with a reverse phase gradient system beginning with 0.1% TFA aqueous eluent gradually shifting to methanol according to the following method: 0-5.0 min (75% TFA, 25% MeOH), 5.0-9.1 min (25% MeOH to 34% MeOH linear gradient), 9.1-20.0 min (34% to 100% MeOH linear gradient), 20.0-30.0 min (100% MeOH) at a flow rate of 10.0 mL/min. FT-IR spectra were obtained on a Thermo Nicolet 6700 FT-IR with an ATR cell and analyzed with OMNIC 7.1 software. Mass spectra were obtained on a Thermo-Finnigan LCQ Advantage ESI-MS.

### **X-Ray Crystallography**

Crystals of compound **9** were analyzed at 293(2) K on a Nonius KappaCCD diffractometer using MoK $\alpha$  irradiation ( $\lambda = 0.71073$  Å) in a series of phi and omega scans. Data collection, cell refinement and data reduction were performed using *Collect*<sup>5</sup> and *HKL Scalepack/Denzo*<sup>6</sup>, respectively. The crystal structures were solved by direct methods and refined by least squares method on  $F^2$  using SHELXS-97 and SHELXL-97, respectively. All non-hydrogen atoms were refined anisotropically. All hydrogen atoms bonded to carbon atoms were located in the Fourier-difference electron-density map, fixed in geometrically constrained riding positions and isotropically refined. Crystallographic data of the investigated compounds are available in the cif file. All bond distances (Å) and angles (°) are listed in Table S1.

### Scheme S1. Synthesis of the symmetric complexes

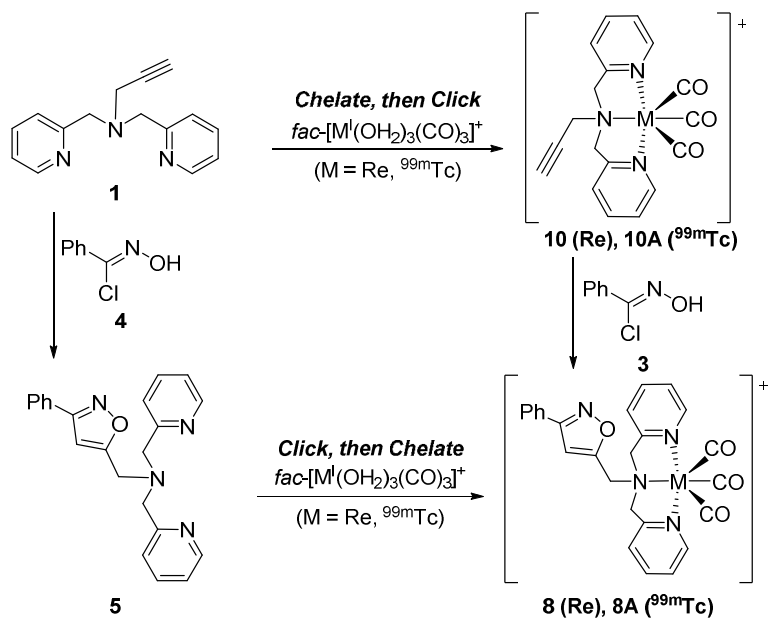

### Scheme S2. Synthesis of the asymmetric complexes

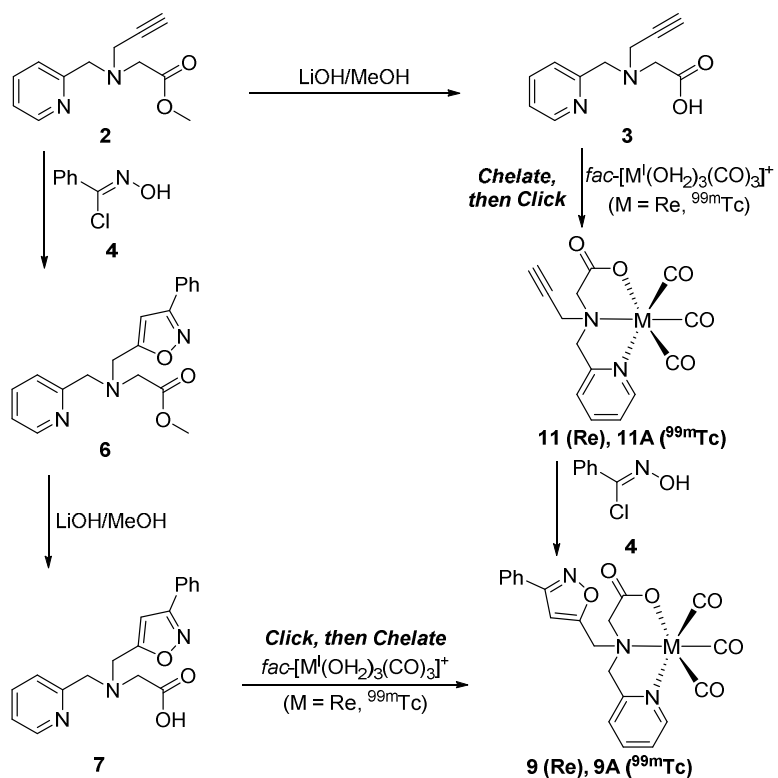

### **1-(3-phenylisoxazol-5-yl)-N,N-bis(pyridin-2-ylmethyl)methanamine, 5.**

A 20 mL scintillation vial was charged with **1** (66.7 mg, 0.28 mmol), **4** (87.0 mg, 0.56 mmol) and methylene chloride (5 mL). The dropwise addition of NaHCO<sub>3(aq)</sub> (1.0 M, 0.56 mmol) produced a colorless heterogeneous solution. The solution was vigorously stirred at rt for 1 h and purified by prep RP-HPLC to yield **5** as a yellow oil (44.9 mg; 45%). <sup>1</sup>H NMR [ $\delta$  (ppm), CD<sub>3</sub>OD] 8.63 (d, 2H,  $J$  = 2.42), 8.22 (t, 2H,  $J$  = 7.81), 7.85 (d, 2H,  $J$  = 7.97), 7.66 (t, 2H,  $J$  = 6.67), 7.54 – 7.52 (m, 2H), 7.25 – 7.22 (m, 3H), 6.63 (s, 1H), 4.20 (s, 4H), 3.87 (s, 2H); <sup>13</sup>C NMR [ $\delta$  (ppm), CD<sub>3</sub>OD] 169.5, 163.9, 155.1, 146.5, 144.2, 131.4, 130.1, 129.7, 127.9, 127.8, 126.9, 104.4, 57.7, 49.9;  $\lambda_{\text{max}}$ (CH<sub>3</sub>OH)/nm ( $\epsilon/\text{dm}^3 \text{ mol}^{-1} \text{ cm}^{-1}$ ): 231 (11,978);  $\nu_{\text{max}}/\text{cm}^{-1}$ : 1620 (Isox Ring) 1179 (Isox C-H), 1128 (Isox Ring); m/z 379.3 ([M+Na]<sup>+</sup> 100 %) 357.3 ([M+H]<sup>+</sup> 30 %).

### ***fac*-[Re<sup>I</sup>(CO)<sub>3</sub>(**5**)](OSO<sub>2</sub>CF<sub>3</sub>), 8.**

**Chelate, then Click:** A 20 mL scintillation vial was charged with [Re<sup>I</sup>(CO)<sub>3</sub>(**1**)<sup>+</sup>, **10**, (10.29 mg, 0.015 mmol) and **4** (9.53 mg, 0.06 mmol) in methylene chloride (1 mL). The dropwise addition of NaHCO<sub>3(aq)</sub> (1.0 M, 31  $\mu$ L, 0.03 mmol) produced a colorless heterogeneous solution. The solution was vigorously stirred at rt for 15 h. The reaction mixture was dissolved in 6 mL of 0.1% TFA/MeOH solution (25% MeOH) and purified by prep RP-HPLC to yield **8**•TFA as a yellow oil (6.16 mg; 53%). Analytical data (<sup>1</sup>H, <sup>13</sup>C NMR, MS) were identical to the product formed in the following procedure.

**Click, then Chelate:** To a methanolic solution of **5** (40.42 mg, 0.11 mmol) in a 20 mL scintillation vial, 0.1 M *fac*-[Re<sup>I</sup>(OH<sub>2</sub>)<sub>3</sub>(CO)<sub>3</sub>](OSO<sub>2</sub>CF<sub>3</sub>)<sub>(aq)</sub> (1.4 mL, 0.14 mmol) was added slowly while stirring at rt. The vial was sealed and stirred for 12 h producing an off-white precipitate that was collected via vacuum filtration. (65.4 mg; 75%). <sup>1</sup>H NMR [ $\delta$  (ppm), CD<sub>3</sub>OD] 8.84 (d, 2H,  $J$  = 5.6), 7.91 – 7.85 (m, 2H), 7.50 – 7.47 (m, 5H), 7.33 (t, 2H,  $J$  = 6.8), 7.28 (s, 1H), 5.14 (s, 2H), 4.91 (ABq, 4H,  $\Delta\delta_{\text{AB}}$  = 0.16,  $J$

= 16.5);  $^{13}\text{C}$  NMR [ $\delta$  (ppm),  $\text{CD}_3\text{OD}$ ] 166.8, 164.4, 161.3, 153.1, 141.7, 131.6, 130.2, 129.7, 128.0, 127.0, 124.8, 107.6, 69.5, 63.5;  $\lambda_{\text{max}}(\text{CH}_3\text{OH})/\text{nm}$  ( $\epsilon/\text{dm}^3 \text{ mol}^{-1} \text{ cm}^{-1}$ ): 230 (25,523), 295 (6,755);  $\nu_{\text{max}}/\text{cm}^{-1}$ : 2029 and 1900 (CO), 1611 (Isox Ring), 1160 (C-H);  $m/z$  627.2 ( $[\text{M}^+]$  100 %); Calc for  $\text{C}_{26}\text{H}_{20}\text{F}_3\text{N}_4\text{O}_7\text{SRe}\cdot\text{CH}_2\text{Cl}_2$ : C, 37.67; H, 2.58; N, 6.51. Found: C, 37.30; H, 2.61; N, 6.53.

### **methyl 2-(((3-phenylisoxazol-5-yl)methyl)(pyridin-2-ylmethyl)amino)acetate, 6.**

A 20 mL scintillation vial was charged with **2** (77.7 mg, 0.35 mmol), **4** (107.6 mg, 0.69 mmol) and methylene chloride (2 mL). The dropwise addition of  $\text{NaHCO}_3(\text{aq})$  (1.0 M, 0.69 mmol) produced a colorless heterogeneous solution. The solution was vigorously stirred at rt for 12 h and purified by prep RP-HPLC to yield **6** as a yellow oil (58.7 mg, 50%).  $^1\text{H}$  NMR [ $\delta$  (ppm),  $\text{CD}_3\text{OD}$ ] 8.73 (d, 1H,  $J = 5.9$ ), 8.45 (td, 1H,  $J = 1.6, 7.9$ ), 8.00 (d, 1H,  $J = 8.1$ ), 7.87 (t, 1H,  $J = 6.4$ ), 7.76 – 7.73 (m, 2H), 7.48 – 7.45 (m, 3H), 6.79 (s, 1H), 4.43 (s, 2H), 4.20 (s, 2H), 3.81 (s, 2H), 3.73 (s, 3H);  $^{13}\text{C}$  NMR [ $\delta$  (ppm),  $\text{CD}_3\text{OD}$ ] 172.9, 170.7, 163.8, 156.6, 146.8, 142.9, 131.3, 130.1, 129.8, 127.7, 127.2, 126.6, 103.5, 56.5, 56.1, 52.3, 50.4;  $\lambda_{\text{max}}(\text{CH}_3\text{OH})/\text{nm}$  ( $\epsilon/\text{dm}^3 \text{ mol}^{-1} \text{ cm}^{-1}$ ): 242 (16,400);  $\nu_{\text{max}}/\text{cm}^{-1}$ : 1609 (Isox Ring), 1171 (Isox C-H), 1126 (Isox Ring);  $m/z$  338.2 ( $[\text{M}+\text{H}^+]$  100%).

### **2-(((3-phenylisoxazol-5-yl)methyl)(pyridin-2-ylmethyl)amino)acetic acid, 7.**

Compound **6** (58.7 mg, 0.17 mmol) was dissolved in methanol (1.5 mL). After dropwise addition of  $\text{LiOH}(\text{aq})$  (0.5 mL, 1.0 M), the reaction was stirred 15 h at rt and purified by prep RP-HPLC to yield **7** as a light yellow oil (27.6 mg, 49 %).  $^1\text{H}$  NMR [ $\delta$  (ppm),  $\text{CD}_3\text{OD}$ ] 8.73 (d, 1H,  $J = 5.7$ ), 8.43 (td, 1H,  $J = 1.5, 7.9$ ), 7.97 (d, 1H,  $J = 8.1$ ), 7.85 (t, 1H,  $J = 6.8$ ), 7.78 – 7.72 (m, 2H), 7.49 – 7.44 (m, 3H), 6.80 (s, 1H), 4.42 (s, 2H), 4.21 (s, 2H), 3.78 (s, 2H);  $^{13}\text{C}$  NMR [ $\delta$  (ppm),  $\text{CD}_3\text{OD}$ ] 174.4, 170.7, 163.9, 156.6, 147.1, 142.7, 131.4, 130.1, 129.9, 127.8, 127.3, 126.7, 103.7, 56.7, 56.6, 50.5;  $\lambda_{\text{max}}(\text{CH}_3\text{OH})/\text{nm}$  ( $\epsilon/\text{dm}^3$

$\text{mol}^{-1} \text{ cm}^{-1}$ ): 245 (5,147);  $\nu_{\text{max}}/\text{cm}^{-1}$ : 1620 (Isox Ring), 1180 (Isox C-H), 1127 (Isox Ring);  $m/z$  324.2 ([ $\text{M}+\text{H}^+$ ] 100%).

***fac*-[ $\text{Re}^{\text{I}}(\text{CO})_3$ ](**7**), **9**.**

***Chelate, then Click***: A 20 mL scintillation vial was charged with [ $\text{Re}^{\text{I}}(\text{CO})_3$ ](**3**), **11**, (20.4 mg, 0.04 mmol) and **4** (14.5 mg, 0.09 mmol) in methylene chloride (2 mL). The dropwise addition of  $\text{NaHCO}_3(\text{aq})$  (1.0 M, 0.09 mmol) produced a colorless heterogeneous solution. Methanol (1 mL) was added dropwise to facilitate solubility. The solution was vigorously stirred at rt for 12 h producing a white precipitate that was collected via vacuum filtration. The filtered material was re-dissolved in 3:1 DCM:MeOH and recrystallized via slow evaporation (18.7 mg; 73 %).

***Click, then Chelate***: To a methanolic solution of **7** (44.8 mg, 0.13 mmol) in a 20 mL scintillation vial, 0.1 M *fac*-[ $\text{Re}^{\text{I}}(\text{OH}_2)_3(\text{CO})_3$ ]( $\text{OSO}_2\text{CF}_3$ ) $_{(\text{aq})}$  (1.524 mL, 0.15 mmol) was added slowly while stirring. 1.0 M solution of  $\text{NaHCO}_3(\text{aq})$  was added dropwise to neutralize the solution to pH 6. The vial was sealed and stirred for 12 h at 40 °C producing a white precipitate that was collected via vacuum filtration. The filtered material was re-dissolved in 2:1 DCM:MeOH and X-ray quality crystals of **9** were grown by slow evaporation of DCM (45.1 mg; 59 %).  $^1\text{H}$  NMR [ $\delta$  (ppm),  $(\text{CD}_3)_2\text{SO}$ ] 8.76 (d, 1H,  $J = 5.0$ ), 8.12 (td, 1H,  $J = 1.3, 7.8$ ), 7.90 – 8.87 (m, 2H), 7.72 (d, 1H,  $J = 7.7$ ), 7.59 – 7.52 (m, 4H), 7.39 (s, 1H), 4.88 (ABq, 2H,  $\Delta\delta_{\text{AB}} = 0.07$ ,  $J = 14.5$ ), 4.69 (ABq, 2H,  $\Delta\delta_{\text{AB}} = 0.05$ ,  $J = 15.5$ ), 3.71 (ABq, 2H,  $\Delta\delta_{\text{AB}} = 0.38$ ,  $J = 16.7$ );  $^{13}\text{C}$  NMR [ $\delta$  (ppm),  $(\text{CD}_3)_2\text{SO}$ ] 178.21, 166.34, 162.01, 158.81, 152.07, 140.59, 130.50, 129.28, 128.25, 126.67, 126.03, 124.23, 105.78, 99.56, 68.18, 61.18;  $\lambda_{\text{max}}(\text{CH}_3\text{OH})/\text{nm}$  ( $\epsilon/\text{dm}^3 \text{ mol}^{-1} \text{ cm}^{-1}$ ): 243 (19,231), 305 (3,573);  $\nu_{\text{max}}/\text{cm}^{-1}$ : 2013, 1903, and 1873 (CO), 1609 (Isox Ring), 1160 (Isox C-H);  $m/z$  594.2 ([ $\text{M}+\text{H}^+$ ] 100 %); Calc for  $\text{C}_{21}\text{H}_{16}\text{N}_3\text{O}_6\text{Re}\cdot\text{CH}_3\text{OH}$ : C, 42.30; H, 3.22; N, 6.27. Found: C, 42.07; H, 2.73; N, 6.59.

### ***Cysteine and Histidine Challenge Studies***

Complex stability studies were conducted on purified samples of **8** and **9**. The Re complexes (100  $\mu$ L, 100  $\mu$ M) were added to an equal volume of cysteine or histidine solution (100  $\mu$ L, 2 mM) dissolved in a phosphate buffer (10 mM, pH 7.4) to give a final amino acid concentration of 1 mM. The solutions were incubated at 37 °C in a temperature controlled water bath that were sampled at 1, 4, and 24 h and analyzed by analytical HPLC. The relative ratio of the product peak was compared to the additional peaks observed in the chromatogram to determine the stability of the product under the respective amino acid challenge conditions.

### **General *fac*-[<sup>99m</sup>Tc(OH)<sub>2</sub>(CO)<sub>3</sub>]<sup>+</sup> radiolabeling procedure, **8A**, **9A**, **10A**, **11A****

The ligand **1**, **3**, **5**, **7** (100  $\mu$ L, 10<sup>-3</sup>, 10<sup>-4</sup> or 10<sup>-5</sup> M) and phosphate buffer (800  $\mu$ L, 0.01 M, pH 7.4) was added to a sealable labeling vial (5.0 mL). The vial was sealed and degassed with nitrogen for ~10 min. The *fac*-[<sup>99m</sup>Tc(OH)<sub>2</sub>(CO)<sub>3</sub>]<sup>+</sup> precursor solution (100  $\mu$ L) was prepared in an Isolink® kit following Tyco specifications. The solution was added to a degassed vial and the vial heated for 30 min at 70° C. The reaction mixture was then carefully allowed to cool on an ice bath prior to injection and analysis by radio-HPLC. Purified **10A** and **11A** were blown down under nitrogen to yield a solid residue that was dissolved in dry DCM (500  $\mu$ L) prior to subsequent reactions.

### ***Chelate, then Click***

The oxime **4** (200  $\mu$ L, 10<sup>-3</sup> M in DCM) was added to a sealable labeling vial (5.0 mL). The vial was fitted with a micro stir bar, sealed and degassed with nitrogen for ~10 min, 400  $\mu$ L of dry DCM was added and the vial degassed for one additional minute. Purified **10A** or **11A** (100  $\mu$ L) were added to the

sealed vial followed by  $\text{NaHCO}_3$  (20  $\mu\text{L}$ , 1.0 M). The reaction was stirred vigorously at rt for 2.5, 5, 30, and 60 min then blown down to dryness with nitrogen. The residue was dissolved in methanol (500  $\mu\text{L}$ ) prior to injection and analysis by radio-HPLC.

### ***Cysteine and Histidine Challenge Studies***

Complex stability studies were conducted on HPLC purified samples of **8A** and **9A**. The  $^{99\text{m}}\text{Tc}$  samples (50  $\mu\text{L}$ ,  $\sim 10$   $\mu\text{Ci}$ ) were added to an equal volume of cysteine or histidine solution (50  $\mu\text{L}$ , 2 mM) dissolved in a phosphate buffer (10 mM, pH 7.4) to give a final amino acid concentration of 1 mM. The solutions were incubated at 37  $^\circ\text{C}$  in a temperature controlled water bath that were sampled at 1, 4, and 24 h and analyzed by radio ( $\gamma$ )-HPLC. The relative ratio of the product peak was compared to the additional peaks observed in the chromatogram to determine the stability of the product under the respective amino acid challenge conditions.



**Table S1.** All bond distances (Å) and bond angles (°) for *fac*-[Re<sup>I</sup>(CO)<sub>3</sub>(7)], **9**

|     |      |          |     |      |          |          |      |     |          |          |
|-----|------|----------|-----|------|----------|----------|------|-----|----------|----------|
| Re1 | O4   | 2.125(4) | O7  | C22  | 1.400(9) | N2       | C6   | H6A | 109.4(4) |          |
| Re1 | N1   | 2.172(4) | C22 | H22A | 0.96(1)  | N2       | C6   | H6B | 109.4(4) |          |
| Re1 | N2   | 2.233(4) | C22 | H22B | 0.960(6) | C7       | C6   | H6A | 109.3(4) |          |
| Re1 | C2   | 1.909(5) | C22 | H22C | 0.961(8) | C7       | C6   | H6B | 109.4(4) |          |
| Re1 | C3   | 1.915(5) | O4  | Re1  | N1       | 78.4(1)  | H6A  | C6  | H6B      | 108.0(5) |
| Re1 | C1   | 1.914(6) | O4  | Re1  | N2       | 78.6(1)  | O6   | C13 | C14      | 107.6(5) |
| O1  | C1   | 1.148(7) | O4  | Re1  | C2       | 174.7(2) | O6   | C13 | C12      | 116.9(4) |
| O2  | C2   | 1.157(7) | O4  | Re1  | C3       | 96.8(2)  | C14  | C13 | C12      | 135.4(5) |
| O3  | C3   | 1.154(6) | O4  | Re1  | C1       | 94.7(2)  | C8   | C9  | H9       | 120.4(6) |
| O4  | C4   | 1.302(7) | N1  | Re1  | N2       | 77.1(1)  | C8   | C9  | C10      | 119.2(5) |
| O5  | C4   | 1.222(7) | N1  | Re1  | C2       | 97.7(2)  | H9   | C9  | C10      | 120.4(6) |
| O6  | N3   | 1.412(6) | N1  | Re1  | C3       | 173.4(2) | N2   | C12 | C13      | 115.5(4) |
| O6  | C13  | 1.354(6) | N1  | Re1  | C1       | 96.4(2)  | N2   | C12 | H12A     | 108.4(4) |
| N1  | C11  | 1.348(5) | N2  | Re1  | C2       | 97.1(2)  | N2   | C12 | H12B     | 108.4(4) |
| N1  | C7   | 1.357(6) | N2  | Re1  | C3       | 97.5(2)  | C13  | C12 | H12A     | 108.4(4) |
| N2  | C6   | 1.498(6) | N2  | Re1  | C1       | 171.4(2) | C13  | C12 | H12B     | 108.4(4) |
| N2  | C12  | 1.499(5) | C2  | Re1  | C3       | 86.7(2)  | H12A | C12 | H12B     | 107.4(5) |
| N2  | C5   | 1.498(8) | C2  | Re1  | C1       | 89.3(2)  | C16  | C21 | H21      | 119.9(6) |
| N3  | C15  | 1.312(7) | C3  | Re1  | C1       | 88.6(2)  | C16  | C21 | C20      | 120.2(6) |
| C14 | H14  | 0.930(6) | Re1 | O4   | C4       | 118.3(3) | H21  | C21 | C20      | 119.9(6) |
| C14 | C15  | 1.372(7) | N3  | O6   | C13      | 108.1(4) | C16  | C17 | H17      | 120.2(6) |
| C14 | C13  | 1.348(9) | Re1 | N1   | C11      | 124.4(3) | C16  | C17 | C18      | 119.7(5) |
| C16 | C15  | 1.468(8) | Re1 | N1   | C7       | 116.1(3) | H17  | C17 | C18      | 120.1(6) |
| C16 | C21  | 1.394(7) | C11 | N1   | C7       | 118.6(4) | Re1  | C1  | O1       | 178.1(5) |
| C16 | C17  | 1.387(8) | Re1 | N2   | C6       | 106.9(3) | O4   | C4  | O5       | 124.3(5) |
| C11 | H11  | 0.930(5) | Re1 | N2   | C12      | 112.8(3) | O4   | C4  | C5       | 115.7(4) |
| C11 | C10  | 1.380(7) | Re1 | N2   | C5       | 107.8(3) | O5   | C4  | C5       | 119.8(5) |
| C7  | C8   | 1.390(7) | C6  | N2   | C12      | 109.6(4) | N2   | C5  | C4       | 113.6(4) |
| C7  | C6   | 1.496(6) | C6  | N2   | C5       | 110.1(4) | N2   | C5  | H5A      | 108.8(5) |
| C8  | H8   | 0.931(5) | C12 | N2   | C5       | 109.5(4) | N2   | C5  | H5B      | 108.8(5) |
| C8  | C9   | 1.376(7) | O6  | N3   | C15      | 106.1(4) | C4   | C5  | H5A      | 108.8(5) |
| C6  | H6A  | 0.970(6) | H14 | C14  | C15      | 126.0(6) | C4   | C5  | H5B      | 108.9(5) |
| C6  | H6B  | 0.970(5) | H14 | C14  | C13      | 126.1(6) | H5A  | C5  | H5B      | 107.7(5) |
| C13 | C12  | 1.490(7) | C15 | C14  | C13      | 107.9(5) | C17  | C18 | H18      | 119.4(6) |
| C9  | H9   | 0.931(6) | Re1 | C2   | O2       | 177.3(5) | C17  | C18 | C19      | 121.2(6) |
| C9  | C10  | 1.384(8) | Re1 | C3   | O3       | 177.5(4) | H18  | C18 | C19      | 119.4(7) |
| C12 | H12A | 0.971(5) | C15 | C16  | C21      | 120.2(5) | C21  | C20 | H20      | 119.6(6) |
| C12 | H12B | 0.970(6) | C15 | C16  | C17      | 120.4(5) | C21  | C20 | C19      | 120.6(6) |
| C21 | H21  | 0.930(7) | C21 | C16  | C17      | 119.5(5) | H20  | C20 | C19      | 119.7(6) |
| C21 | C20  | 1.38(1)  | N1  | C11  | H11      | 118.8(5) | C18  | C19 | C20      | 118.8(6) |
| C17 | H17  | 0.930(5) | N1  | C11  | C10      | 122.3(5) | C18  | C19 | H19      | 120.6(7) |
| C17 | C18  | 1.39(1)  | H11 | C11  | C10      | 118.9(5) | C20  | C19 | H19      | 120.6(7) |

|     |     |          |     |     |     |          |      |     |      |          |
|-----|-----|----------|-----|-----|-----|----------|------|-----|------|----------|
| C4  | C5  | 1.520(5) | N1  | C7  | C8  | 121.4(4) | C11  | C10 | C9   | 119.1(5) |
| C5  | H5A | 0.969(6) | N1  | C7  | C6  | 115.3(4) | C11  | C10 | H10  | 120.4(5) |
| C5  | H5B | 0.970(6) | C8  | C7  | C6  | 123.3(4) | C9   | C10 | H10  | 120.5(5) |
| C18 | H18 | 0.929(7) | C7  | C8  | H8  | 120.2(5) | H7   | O7  | C22  | 109.5(6) |
| C18 | C19 | 1.387(9) | C7  | C8  | C9  | 119.4(5) | O7   | C22 | H22A | 109.5(7) |
| C20 | H20 | 0.930(6) | H8  | C8  | C9  | 120.4(5) | O7   | C22 | H22B | 109.4(7) |
| C20 | C19 | 1.38(1)  | N3  | C15 | C14 | 110.2(5) | O7   | C22 | H22C | 109.4(7) |
| C19 | H19 | 0.930(7) | N3  | C15 | C16 | 121.3(5) | H22A | C22 | H22B | 109.5(8) |
| C10 | H10 | 0.930(5) | C14 | C15 | C16 | 128.4(5) | H22A | C22 | H22C | 109.5(8) |
| O7  | H7  | 0.820(4) | N2  | C6  | C7  | 111.4(4) | H22B | C22 | H22C | 109.5(8) |

**Table S2.** Stability studies of **8**, **8A**, **9** and **9A** in competition with histidine or cysteine (1 mM) in phosphate buffer (10mM, pH 7.4) at 37 °C.

| <b>Complex</b> | <b>Amino Acid</b> | <b>1 h</b> | <b>4 h</b> | <b>24 h</b> |
|----------------|-------------------|------------|------------|-------------|
| <b>8</b>       | Cys               | >99%       | >99%       | >99%        |
|                | His               | >99%       | >99%       | >99%        |
| <b>8A</b>      | Cys               | >99%       | >99%       | >99%        |
|                | His               | >99%       | >99%       | >99%        |
| <b>9</b>       | Cys               | >99%       | >99%       | >99%        |
|                | His               | >99%       | >99%       | >99%        |
| <b>9A</b>      | Cys               | >99%       | >99%       | >99%        |
|                | His               | >99%       | >99%       | >99%        |

## References:

- (1) Casey, C. P.; Meszaros, M. W.; Neumann, S. M.; Cesa, I. G.; Haller, K. J., *Organometallics* **1985**, *4*, 143-149.
- (2) Bottorff, S. C.; Moore, A. L.; Wemple, A. R.; Bucar, D. K.; MacGillivray, L. R.; Benny, P. D., *Inorg. Chem.* **2013**, *52*, 2939-2950.
- (3) Liu, K.-C.; Shelton, B. R.; Howe, R. K., *J. Org. Chem.* **1980**, *45*, 3916-3918.
- (4) Moore, A. L.; Bucar, D.-K.; MacGillivray, L. R.; Benny, P. D., *Dalton Trans.* **2010**, *39*, 1926-1928.
- (5) Hooft, R. W. W., *COLLECT*. Nonius BV, Delft, The Netherlands, 1998.
- (6) Otwinowski, A.; Minor, W., Methods in Enzymology. In *Macromolecular Crystallography, Part A*, Carter Jr, C. W.; Sweet, R. M., Eds. Academic Press: New York, 1997; Vol. 276, pp 307-326.
